# Supplementary material
Source: PubMed Central journal article supplement (PMC10947576)
Supplement: ANIE-61-0-s001.pdf [file ANIE-61-0-s001.pdf]

## Installing ChemSCAD – February 2022

This word file is provided for convenience, however, since publication ChemSCAD may change versions which can be checked at <https://pypi.org/project/chemscad/#files>. ChemSCAD requires Python 3.6 or above. Tested and working with Python 3.8, Python versions 3.9 and above do not work.

See installation video instructions here:

[https://pubs.acs.org/doi/suppl/10.1021/acscentsci.0c01354/suppl\\_file/oc0c01354\\_si\\_002.mp4](https://pubs.acs.org/doi/suppl/10.1021/acscentsci.0c01354/suppl_file/oc0c01354_si_002.mp4)

ChemSCAD was tested with OpenSCAD 2019-05 (most up-to-date version as of March 2020)

- Install OpenSCAD for your operating system as follows:

For Windows:

All OpenSCAD dependencies including the binaries are included in the setup.py for ChemSCAD, so will be installed automatically when installing the requirements.txt file.

Therefore, please proceed to the ChemSCAD installations instructions below.

For Mac:

OpenSCAD can be installed using the .dmg installable from the following link: <https://files.openscad.org/OpenSCAD-2019.05.dmg>

Install this .dmg file, making sure to accept all permissions in Security & Privacy from within System Preferences.

### **ChemSCAD installation for Windows:**

Prior to installing ChemSCAD it is recommended to make a virtual environment (venv) in order to not have any conflicts with existing installed pip packages.

```
py -m pip install --user virtualenv
```

```
py -m venv chemscad-env
```

```
.\chemscad-env\Scripts\activate
```

PyQt5 *may* have to be installed manually, dependent on your installation. Install with:

```
pip install PyQt5
```

Installation is simple, simply pip-install the `chemscad` package:

```
pip install chemscad
```

ChemSCAD can now be run from a command line using the command: `chemscad`
